# Supplementary material for: Rapid and Nondestructive Evaluation of Wheat Chlorophyll under Drought Stress Using Hyperspectral Imaging
Source: MDPI journal article supplement (doi:10.3390/ijms24065825), 2023-03-18
Supplement: s1 [file s1]

**Table S1.** Germplasm information of 335 wheat varieties (strains)

| Numbers | Varieties (Strains)                                                                                                         | Numbers | Varieties (Strains) |
|---------|-----------------------------------------------------------------------------------------------------------------------------|---------|---------------------|
| 1       | Fielder                                                                                                                     | 169     | Kenong199           |
| 2       | Bobwhite                                                                                                                    | 170     | Ningmai13           |
| 3       | Xinong979                                                                                                                   | 171     | Shimai12            |
| 4       | Triticum dicoccum Schuebl                                                                                                   | 172     | Zhongmai175         |
| 5       | Triticum compactum Host                                                                                                     | 173     | Zhouyuan9369        |
| 6       | Triticum turgidum Linn                                                                                                      | 174     | Zhoumai22           |
| 7       | Triticum persicum Zhuk                                                                                                      | 175     | Mianmai46           |
| 8       | Foshou wheat                                                                                                                | 176     | Ningmai15           |
| 9       | Triticum turgidum subsp.<br>durum (Desfontaines) Husnot                                                                     | 177     | NingnuomaiNo.1      |
| 10      | Triticum dicoccoides Korn                                                                                                   | 178     | Xinong928           |
| 11      | Triticale(4X)                                                                                                               | 179     | Zhongyou206         |
| 12      | Triticale II                                                                                                                | 180     | Zhoumai23           |
| 13      | Triticum turgidum subsp.<br>durum (Desfontaines) Husnot<br>4286                                                             | 181     | Jl5265              |
| 14      | 091                                                                                                                         | 182     | Shimai19            |
| 15      | Brazil                                                                                                                      | 183     | ZhongjiaoNo.2       |
| 16      | Mexico67                                                                                                                    | 184     | Xinmai26            |
| 17      | Mexico61                                                                                                                    | 185     | Kaimai21            |
| 18      | Mexico69                                                                                                                    | 186     | Jiaomai266          |
| 19      | Indian Lanli                                                                                                                | 187     | Nongda1108          |
| 20      | 15JH6 Hongli                                                                                                                | 188     | XunongNo.7          |
| 21      | Unknown (Hongli)                                                                                                            | 189     | Zhongxin78          |
| 22      | Anhong                                                                                                                      | 190     | Zhoumai26           |
| 23      | JiheNo.1                                                                                                                    | 191     | Bainong207          |
| 24      | Unknown (Barly/Aegilops<br>tauschii Coss//Triticum<br>turgidum subsp. durum<br>(Desfontaines) Husnot ⊕<br>-1-4-4-2-3-2-2-2) | 192     | Zhoumai32           |
| 25      | Unknown(zh-wheat/Lang//zh-w<br>heat-1-1-2-1-1)                                                                              | 193     | Xinong109           |
| 26      | Unknown (lang/Indian<br>Lanli(3)-2-9-1-2-1-4-1-1-1)                                                                         | 194     | Xinong511           |
| 27      | Baibanaihua1                                                                                                                | 195     | Chang6794           |
| 28      | Baibanaihua2                                                                                                                | 196     | TongmaiNo.6         |
| 29      | Lanli(H)                                                                                                                    | 197     | Xinong100           |
| 30      | Hongli(h)                                                                                                                   | 198     | Zhongmai578         |
| 31      | Zisemai                                                                                                                     | 199     | WeimaiNo.9          |
| 32      | Nuomai                                                                                                                      | 200     | Jimai22             |
| 33      | IR4                                                                                                                         | 201     | Jimai22MYBmutant    |
| 34      | IR145                                                                                                                       | 202     | UNIVERSAL II        |
| 35      | IR150                                                                                                                       | 203     | SUNSET              |
| 36      | IR165                                                                                                                       | 204     | JOHNBROWN           |
| 37      | IR166                                                                                                                       | 205     | RED-BOBS-222        |

|    |                |     |                              |
|----|----------------|-----|------------------------------|
| 38 | IR170          | 206 | PUSA80-5                     |
| 39 | IR171          | 207 | ALSHVEDE                     |
| 40 | IR176          | 208 | LAGODEKHIS-GRDZELTAVT<br>AVA |
| 41 | IR178          | 209 | KENNEDYHARLANJ.R38           |
| 42 | IR179          | 210 | MEX94.10.1                   |
| 43 | IR181          | 211 | QRO94.1.1                    |
| 44 | IR182          | 212 | TOL93.1.2                    |
| 45 | IR183          | 213 | GHARFLOR-1611                |
| 46 | IR185          | 214 | LOHARIY91-92NO.123           |
| 47 | IR188          | 215 | GRIFONE235                   |
| 48 | IR226          | 216 | MONTEZUMA-CLUB               |
| 49 | IR228          | 217 | LAGEADINHO                   |
| 50 | IR236          | 218 | SENMARQ                      |
| 51 | IR39           | 219 | INDIANOMOCHO6296             |
| 52 | IR44           | 220 | ABYSSINIAN43                 |
| 53 | IR74           | 221 | RASHKOOL                     |
| 54 | IR79           | 222 | TIGARIA                      |
| 55 | IR89           | 223 | GEHUNFARAMI                  |
| 56 | IR192          | 224 | NEPHADINDIAN                 |
| 57 | IR193          | 225 | AURORE4323A                  |
| 58 | IR196          | 226 | HOMARANO44                   |
| 59 | IR197          | 227 | 2794:AE                      |
| 60 | IR198          | 228 | Samson                       |
| 61 | IR202          | 229 | FS056                        |
| 62 | IR209          | 230 | 9H65A                        |
| 63 | IR211          | 231 | RAVENNA                      |
| 64 | IR214          | 232 | ENESCO                       |
| 65 | IR216          | 233 | SIRMIONE                     |
| 66 | IR218          | 234 | Neijiang31                   |
| 67 | IR220          | 235 | Dong2-8                      |
| 68 | IR247          | 236 | XingmaiNo.1                  |
| 69 | BimaNo.4       | 237 | Xian83                       |
| 70 | Wuyiwheat      | 238 | Zaosui30                     |
| 71 | Sanyuanwheat   | 239 | Nanda96co76                  |
| 72 | Xibei612       | 240 | Changwei18                   |
| 73 | WannianNo.2    | 241 | Zhengmai9201                 |
| 74 | ShannongNo.1   | 242 | PRIMOASI                     |
| 75 | Shijiazhuang54 | 243 | WeimaiNo.6                   |
| 76 | JinanNo.4      | 244 | ShuangjiNo.4                 |
| 77 | XuzhouNo.8     | 245 | PANDAS                       |
| 78 | Baiyoubao      | 246 | ZhongjiaoNo.1                |
| 79 | Kequan         | 247 | Colotana                     |
| 80 | Xiannong39     | 248 | Camacranaia                  |
| 81 | FengchanNo.1   | 249 | Mianyang79-2                 |
| 82 | BeijingNo.10   | 250 | Mexifen                      |
| 83 | HanxuanNo.10   | 251 | Xifeng                       |
| 84 | JinanNo.8      | 252 | Heibao                       |
| 85 | JinanNo.9      | 253 | H798                         |
| 86 | EmaiNo.6       | 254 | Claudia                      |

|     |              |     |                                 |
|-----|--------------|-----|---------------------------------|
| 87  | FengchanNo.3 | 255 | Hongmangyouzimai                |
| 88  | YangmaiNo.1  | 256 | Baiyoumai                       |
| 89  | QingchunNo.5 | 257 | Chuan84-7045                    |
| 90  | TaishanNo.1  | 258 | Tupatecor                       |
| 91  | XiaoyanNo.4  | 259 | ACForemost                      |
| 92  | YangmaiNo.2  | 260 | Penawa                          |
| 93  | JimaiNo.3    | 261 | Owens                           |
| 94  | Keyi26       | 262 | Tosson                          |
| 95  | MachangNo.2  | 263 | KehongNo.1                      |
| 96  | Wan7107      | 264 | Saet                            |
| 97  | JimaiNo.6    | 265 | Orou                            |
| 98  | LongchunNo.8 | 266 | ACvista                         |
| 99  | YanshiNo.4   | 267 | Abo                             |
| 100 | QingfengNo.1 | 268 | Gezhoumai                       |
| 101 | Yannong15    | 269 | Xiaoziganzi                     |
| 102 | WeimaiNo.4   | 270 | Jichun1016                      |
| 103 | FengkangNo.7 | 271 | Baixiaomai                      |
| 104 | Xiannong151  | 272 | Chayazheda29                    |
| 105 | Yumai18      | 273 | Sanyuehuang                     |
| 106 | AimengniuIV  | 274 | Napo63                          |
| 107 | FengkangNo.8 | 275 | Laser                           |
| 108 | QinmaiNo.1   | 276 | Krac66                          |
| 109 | Jinan13      | 277 | Baipu                           |
| 110 | Jimai22      | 278 | Tumangmai                       |
| 111 | Jimai23      | 279 | Duiker                          |
| 112 | Xichang76-9  | 280 | Sifangmai                       |
| 113 | Xuzhou21     | 281 | Heputou                         |
| 114 | Bainong791   | 282 | Cargo                           |
| 115 | Jimai26      | 283 | Glenlea                         |
| 116 | YumaiNo.10   | 284 | Jingyang60                      |
| 117 | XianNo.8     | 285 | Zaoyangmai                      |
| 118 | Yumai15      | 286 | FRECCIA                         |
| 119 | Lumai15      | 287 | SAGITTARIO                      |
| 120 | Neixiang182  | 288 | Meiyuan1                        |
| 121 | Yumai19      | 289 | Meiyuan4                        |
| 122 | Wanmai19     | 290 | Meiyuan8                        |
| 123 | Xinong88     | 291 | Meiyuan18                       |
| 124 | Xindong20    | 292 | Meiyuan31                       |
| 125 | Shan229      | 293 | Meiyuan44                       |
| 126 | Gaoyou503    | 294 | Meiyuan72                       |
| 127 | Shi-4185     | 295 | Meiyuan77                       |
| 128 | Wanmai31     | 296 | Meiyuan87                       |
| 129 | Yumai54      | 297 | Meiyuan291                      |
| 130 | ZhongmaiNo.9 | 298 | Meiyuan294                      |
| 131 | K173         | 299 | Meiyuan300                      |
| 132 | K193         | 300 | Unknown<br>(PASTOR-2/HUBARA-5)  |
| 133 | K153         | 301 | Unknown<br>(MELLAL-1/OUEDZEM-1) |

|     |                |     |                                                                                               |
|-----|----------------|-----|-----------------------------------------------------------------------------------------------|
| 134 | K163           | 302 | Unknown<br>(YEBROUD'S//DOVE'S/SERI/3<br>/SAFI-1)                                              |
| 135 | R59chuannong12 | 303 | Unknown<br>(MUNIA//CHEN/ALTAR84/3/C<br>HEN/AEGILOPSSQUARROSA(<br>TAUS)//BCN/4/MARCHOUC-<br>8) |
| 136 | Emai16         | 304 | Unknown<br>(KARAWAN-1/TALLO3//JADI<br>DA-2)                                                   |
| 137 | Emai17         | 305 | Unknown<br>(TEVEE-1/STAR'S'/3/ACHTAR*<br>3//KANZ/KS85-8-4)                                    |
| 138 | Emai18         | 306 | Unknown<br>(MOUKA-4*2/4/KEA'S'/3/MN72<br>252//HD2169/BOW'S')                                  |
| 139 | Huaimai20      | 307 | 4332a                                                                                         |
| 140 | MianyangNo.31  | 308 | HeshengNo.2                                                                                   |
| 141 | Yannong22      | 309 | MK95                                                                                          |
| 142 | JimaiNo.20     | 310 | MK165                                                                                         |
| 143 | LiaomaiNo.16   | 311 | MK186                                                                                         |
| 144 | Lunxuan987     | 312 | PENNY                                                                                         |
| 145 | WeimaiNo.8     | 313 | IRAGI                                                                                         |
| 146 | Yannong23      | 314 | 2821:AE                                                                                       |
| 147 | Yangmai13      | 315 | 2495:AE                                                                                       |
| 148 | Yangmai16      | 316 | 1748:AE                                                                                       |
| 149 | Xiaoyan22      | 317 | MICH89.1.3                                                                                    |
| 150 | Zhoumai16      | 318 | OAX93.1.1.1                                                                                   |
| 151 | Ningmai12      | 319 | OSJAKOWSKI                                                                                    |
| 152 | Shiluan02-1    | 320 | Aimengniu V                                                                                   |
| 153 | Shimai12       | 321 | Baihuomai                                                                                     |
| 154 | Taishan23      | 322 | ZhengzhouNo.5                                                                                 |
| 155 | Aikang58       | 323 | Xuzhou25                                                                                      |
| 156 | JiningNo.16    | 324 | Zhoumai20                                                                                     |
| 157 | LianmaiNo.12   | 325 | GLUYASEARLY                                                                                   |
| 158 | Mianmai39      | 326 | MARROCOS16.3608                                                                               |
| 159 | Mianmai40      | 327 | REDSPRING                                                                                     |
| 160 | Qinnong142     | 328 | CENTEIROZ44                                                                                   |
| 161 | Shannong12     | 329 | Yumai49                                                                                       |
| 162 | Wanmai50       | 330 | Ningmai9                                                                                      |
| 163 | Xinong979      | 331 | Yangmai12                                                                                     |
| 164 | Yangmai17      | 332 | VAIOLET                                                                                       |
| 165 | Yumai949       | 333 | Zhongluo08-3                                                                                  |
| 166 | ZhenmaiNo.6    | 334 | KexinNo.9                                                                                     |
| 167 | Zhoumai18      | 335 | Beijing0045                                                                                   |
| 168 | Jimai22        |     |                                                                                               |

---
