# Supplementary material for: Rapid and Nondestructive Evaluation of Wheat Chlorophyll under Drought Stress Using Hyperspectral Imaging
Source: MDPI journal article supplement (doi:10.3390/ijms24065825), 2023-03-18
Supplement: s1 [file s1]

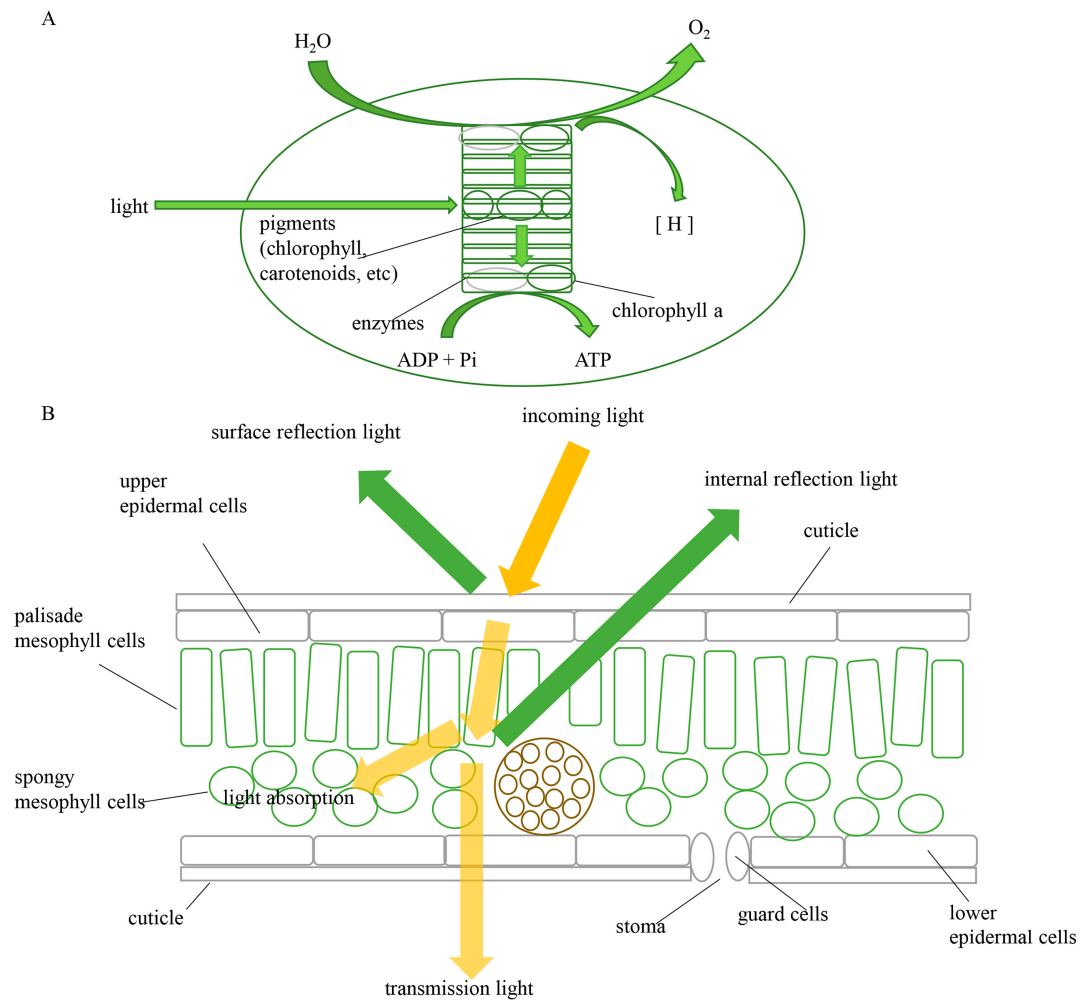

**Figure S1.** The interaction of light with plant leaves. (A) the mechanism of absorption light by chloroplast; (B) optical properties of leaves.
