# Supplementary material for: Rapid and Nondestructive Evaluation of Wheat Chlorophyll under Drought Stress Using Hyperspectral Imaging
Source: MDPI journal article supplement (doi:10.3390/ijms24065825), 2023-03-18
Supplement: s1 [file s1]

**Table S2.** SPAD values of wheat leaf under different soil moisture condition conditions

| Numbers | SPAD value<br>(CK) | SPAD value<br>(DS) | Numbers | SPAD value<br>(CK) | SPAD value<br>(DS) |
|---------|--------------------|--------------------|---------|--------------------|--------------------|
| 1       | 57.09              | 55.4               | 169     | 59.14              | 54.73              |
| 2       | 54.66              | 49.45              | 170     | 61.59              | 57.62              |
| 3       | 56.77              | 54.07              | 171     | 43.55              | 47.82              |
| 4       | 41.09              | 41.76              | 172     | 51.37              | 59.17              |
| 5       | 52.08              | 49.54              | 173     | 53.84              | 58.85              |
| 6       | 47.16              | 49.32              | 174     | 55.58              | 56.08              |
| 7       | 40.09              | 27.63              | 175     | 58.92              | 47.88              |
| 8       | 53.22              | 10.31              | 176     | 59.93              | 57.81              |
| 9       | 38.33              | 50.12              | 177     | 58.54              | 59.31              |
| 10      | 51.31              | 40.15              | 178     | 57.47              | 51.2               |
| 11      | 54.14              | 60.4               | 179     | 54.63              | 60.57              |
| 12      | 49.25              | 39.35              | 180     | 60.77              | 58.82              |
| 13      | 60.96              | 37.2               | 181     | 56.05              | 59.73              |
| 14      | 60.31              | 47.28              | 182     | 55.68              | 55.92              |
| 15      | 57.3               | 55.28              | 183     | 51.1               | 53.52              |
| 16      | 49.21              | 38.61              | 184     | 48.55              | 48.13              |
| 17      | 57.03              | 47.87              | 185     | 52.01              | 56.03              |
| 18      | 51.7               | 13.33              | 186     | 51.53              | 51.01              |
| 19      | 50.94              | 41.09              | 187     | 45.49              | 54.05              |
| 20      | 54.77              | 53.98              | 188     | 58.31              | 57.96              |
| 21      | 60.52              | 58.52              | 189     | 50.31              | 52.35              |
| 22      | 55.84              | 42.89              | 190     | 43.76              | 54.21              |
| 23      | 52.99              | 51.97              | 191     | 46.77              | 59.36              |
| 24      | 47.91              | 55                 | 192     | 48.49              | 53.37              |
| 25      | 60.58              | 63.4               | 193     | 51.45              | 56.06              |
| 26      | 56.12              | 21.9               | 194     | 48.34              | 52.59              |
| 27      | 56.1               | 57.94              | 195     | 50.05              | 52.83              |
| 28      | 67.58              | 59.59              | 196     | 51.81              | 54.68              |
| 29      | 50.83              | 50.37              | 197     | 54.11              | 54.89              |
| 30      | 56.85              | 48.23              | 198     | 54.67              | 62.77              |
| 31      | 58.37              | 58.51              | 199     | 41                 | 54.72              |
| 32      | 57.23              | 58.61              | 200     | 48.46              | 57.91              |
| 33      | 54.31              | 57.6               | 201     | 40.79              | 51.95              |
| 34      | 52.34              | 44.53              | 202     | 53.79              | 58.29              |
| 35      | 51.39              | 50.92              | 203     | 42.9               | 25.85              |
| 36      | 52.73              | 55.5               | 204     | 44.83              | 48.29              |
| 37      | 36.58              | 47.4               | 205     | 46.39              | 18.4               |
| 38      | 52.32              | 53.29              | 206     | 44.15              | 53.37              |
| 39      | 51.06              | 55.56              | 207     | 42.1               | 47.94              |
| 40      | 53.39              | 47.86              | 208     | 48.16              | 39.79              |
| 41      | 45.57              | 52.27              | 209     | 52.1               | 37.51              |
| 42      | 47.93              | 54.6               | 210     | 27.15              | 52.71              |
| 43      | 53.85              | 51.75              | 211     | 41.13              | 46.15              |
| 44      | 55.66              | 51.22              | 212     | 41.73              | 29.35              |
| 45      | 52.94              | 56.39              | 213     | 50.75              | 30.97              |
| 46      | 55.81              | 58.6               | 214     | 46.91              | 39.84              |

|    |       |       |     |       |       |
|----|-------|-------|-----|-------|-------|
| 47 | 50.5  | 44.69 | 215 | 44.27 | 46.92 |
| 48 | 55.13 | 49.6  | 216 | 43.32 | 40.43 |
| 49 | 46.53 | 52.06 | 217 | 50.11 | 46.5  |
| 50 | 52.71 | 52.24 | 218 | 48.26 | 38.61 |
| 51 | 55.41 | 55.31 | 219 | 56.47 | 53.31 |
| 52 | 55.27 | 53.96 | 220 | 67.31 | 46.91 |
| 53 | 46.99 | 53.88 | 221 | 38.15 | 35.46 |
| 54 | 53.11 | 51.2  | 222 | 42.39 | 46.35 |
| 55 | 49.55 | 48.79 | 223 | 49.67 | 45.84 |
| 56 | 52.23 | 53.2  | 224 | 45.18 | 44.43 |
| 57 | 44.25 | 50.28 | 225 | 40.01 | 49.88 |
| 58 | 47.41 | 49.51 | 226 | 40.24 | 44.43 |
| 59 | 53.87 | 55.07 | 227 | 43.05 | 50.27 |
| 60 | 52.11 | 49.5  | 228 | 54.77 | 51.97 |
| 61 | 51.45 | 55.4  | 229 | 50.96 | 59.96 |
| 62 | 51.86 | 58.67 | 230 | 35.3  | 53.97 |
| 63 | 52.55 | 52.68 | 231 | 51.49 | 54.36 |
| 64 | 51.21 | 50.69 | 232 | 58.59 | 64.01 |
| 65 | 47.18 | 44.4  | 233 | 44.42 | 53.95 |
| 66 | 48.87 | 46.1  | 234 | 43.82 | 43.26 |
| 67 | 52.8  | 43.58 | 235 | 51.15 | 57.79 |
| 68 | 50.87 | 52    | 236 | 42.62 | 51.65 |
| 69 | 52.94 | 55.04 | 237 | 52.67 | 47.73 |
| 70 | 44.37 | 42.28 | 238 | 46.93 | 60.67 |
| 71 | 49.5  | 34.28 | 239 | 45.98 | 52.65 |
| 72 | 46.87 | 30.09 | 240 | 47.18 | 56.96 |
| 73 | 51.71 | 45.9  | 241 | 56.8  | 55.37 |
| 74 | 54.75 | 56.01 | 242 | 44.63 | 51.17 |
| 75 | 50.91 | 51.62 | 243 | 44.85 | 43.59 |
| 76 | 52.97 | 48.54 | 244 | 50.99 | 52.53 |
| 77 | 50.49 | 49.04 | 245 | 44.82 | 42.6  |
| 78 | 54.07 | 52.81 | 246 | 46.8  | 51.79 |
| 79 | 49.07 | 51.27 | 247 | 32.13 | 32.16 |
| 80 | 56.38 | 56.35 | 248 | 50.4  | 57.25 |
| 81 | 51.65 | 47.83 | 249 | 47.71 | 56.57 |
| 82 | 51.55 | 26.14 | 250 | 41.9  | 49.94 |
| 83 | 49.05 | 34.6  | 251 | 53.23 | 52.07 |
| 84 | 49.6  | 52.71 | 252 | 46.41 | 55.8  |
| 85 | 53.15 | 46.7  | 253 | 56.45 | 58.76 |
| 86 | 51.72 | 54.91 | 254 | 49.62 | 49.88 |
| 87 | 50    | 51.55 | 255 | 44.03 | 40.16 |
| 88 | 49.89 | 57.55 | 256 | 45.32 | 39.72 |
| 89 | 43.29 | 50.7  | 257 | 50.51 | 49.7  |
| 90 | 46.95 | 53.9  | 258 | 55.23 | 53.88 |
| 91 | 47.54 | 42.2  | 259 | 53.7  | 58.03 |
| 92 | 57.49 | 57.9  | 260 | 40.98 | 44.2  |
| 93 | 54.73 | 50.85 | 261 | 39.75 | 41.15 |
| 94 | 55.64 | 54.13 | 262 | 44.49 | 57.52 |
| 95 | 54.23 | 54.97 | 263 | 49.61 | 52.21 |
| 96 | 49.01 | 37.89 | 264 | 48.36 | 50.93 |

|     |       |       |     |       |       |
|-----|-------|-------|-----|-------|-------|
| 97  | 52.85 | 45.47 | 265 | 44.19 | 51.63 |
| 98  | 53.22 | 55.1  | 266 | 49.17 | 59.33 |
| 99  | 52.01 | 52.79 | 267 | 55.01 | 39.77 |
| 100 | 51.59 | 53.71 | 268 | 50.71 | 45.93 |
| 101 | 36.55 | 35.7  | 269 | 52.35 | 51.43 |
| 102 | 43.33 | 32.75 | 270 | 54.08 | 49.81 |
| 103 | 44.32 | 34.68 | 271 | 52.34 | 53.85 |
| 104 | 51.43 | 51.1  | 272 | 46.57 | 53.6  |
| 105 | 53.81 | 52.9  | 273 | 39.55 | 41.32 |
| 106 | 51.92 | 55.17 | 274 | 51.89 | 48.43 |
| 107 | 50.87 | 49.37 | 275 | 51.61 | 55.37 |
| 108 | 49.15 | 54.99 | 276 | 53.54 | 46.75 |
| 109 | 47.02 | 46.16 | 277 | 30.15 | 31.47 |
| 110 | 49    | 42.5  | 278 | 46.93 | 45.72 |
| 111 | 39.66 | 38.35 | 279 | 48.98 | 33.69 |
| 112 | 54.73 | 36.15 | 280 | 36.23 | 51.42 |
| 113 | 37.97 | 48.37 | 281 | 43.93 | 41.73 |
| 114 | 51.27 | 57.39 | 282 | 48.01 | 48.79 |
| 115 | 55.51 | 57.48 | 283 | 42.06 | 41.86 |
| 116 | 42.77 | 22.15 | 284 | 48.39 | 51.42 |
| 117 | 43.17 | 57.04 | 285 | 45.45 | 46.12 |
| 118 | 52.75 | 44.93 | 286 | 53.59 | 41.99 |
| 119 | 51.37 | 51.07 | 287 | 50.25 | 54.07 |
| 120 | 47.41 | 53.72 | 288 | 50.69 | 52.01 |
| 121 | 48.1  | 51.89 | 289 | 56.95 | 57.66 |
| 122 | 49.25 | 57.37 | 290 | 46.48 | 51.75 |
| 123 | 53.12 | 48.33 | 291 | 54.93 | 59.77 |
| 124 | 52.5  | 57.45 | 292 | 53.77 | 53.23 |
| 125 | 48.79 | 43.53 | 293 | 56.18 | 54.85 |
| 126 | 48.45 | 51.47 | 294 | 54.28 | 55.56 |
| 127 | 56.68 | 60.24 | 295 | 49.49 | 48.99 |
| 128 | 53.3  | 51.43 | 296 | 48.3  | 49.34 |
| 129 | 55.8  | 56.48 | 297 | 48.72 | 52.96 |
| 130 | 54.41 | 51.37 | 298 | 53.73 | 53.87 |
| 131 | 57.68 | 54.55 | 299 | 50.9  | 44.15 |
| 132 | 53.65 | 55.45 | 300 | 52.57 | 44.2  |
| 133 | 51.91 | 54.55 | 301 | 50.25 | 47.67 |
| 134 | 51.6  | 59.65 | 302 | 52.51 | 47.46 |
| 135 | 57.89 | 57.83 | 303 | 49.75 | 46.28 |
| 136 | 52.79 | 54.83 | 304 | 49.57 | 39.32 |
| 137 | 52.64 | 52.43 | 305 | 54.61 | 51.82 |
| 138 | 44.48 | 33.29 | 306 | 52.38 | 56.91 |
| 139 | 54.86 | 66.36 | 307 | 53.13 | 56.36 |
| 140 | 46.74 | 16.25 | 308 | 55.45 | 60.75 |
| 141 | 45.63 | 57.39 | 309 | 56.54 | 60.04 |
| 142 | 53.07 | 58    | 310 | 52.21 | 51.51 |
| 143 | 51.87 | 44.09 | 311 | 46.38 | 47.81 |
| 144 | 43.75 | 63.4  | 312 | 47.71 | 44.86 |
| 145 | 50.95 | 54.92 | 313 | 49.96 | 55.37 |
| 146 | 53.09 | 49.97 | 314 | 42.99 | 48.01 |

|     |       |       |     |       |       |
|-----|-------|-------|-----|-------|-------|
| 147 | 59.16 | 59.85 | 315 | 43.83 | 49.39 |
| 148 | 63.29 | 60.67 | 316 | 47.63 | 48.57 |
| 149 | 56.95 | 56.69 | 317 | 54.48 | 55.68 |
| 150 | 49.93 | 56.29 | 318 | 46.89 | 38.02 |
| 151 | 51.81 | 58.65 | 319 | 46.29 | 51.43 |
| 152 | 44.33 | 36.55 | 320 | 52.77 | 55.76 |
| 153 | 48.55 | 51.99 | 321 | 53.14 | 42.14 |
| 154 | 52.62 | 56.49 | 322 | 49.07 | 49.37 |
| 155 | 48.87 | 56.37 | 323 | 54.91 | 48.75 |
| 156 | 51.26 | 53.53 | 324 | 55.83 | 55.52 |
| 157 | 39.57 | 45.44 | 325 | 51.15 | 49.91 |
| 158 | 48.57 | 56.96 | 326 | 56.63 | 47.45 |
| 159 | 50.87 | 59.57 | 327 | 48.13 | 41.72 |
| 160 | 53.1  | 52.4  | 328 | 45.4  | 42.77 |
| 161 | 52.15 | 55.25 | 329 | 50.5  | 52.25 |
| 162 | 57.44 | 58.61 | 330 | 61.34 | 55.76 |
| 163 | 55.09 | 54.45 | 331 | 55.37 | 52.09 |
| 164 | 51.77 | 36.24 | 332 | 49.45 | 47.36 |
| 165 | 59.04 | 59.23 | 333 | 58.77 | 58.31 |
| 166 | 48.24 | 56.09 | 334 | 49.26 | 55.03 |
| 167 | 50.23 | 47.02 | 335 | 58.47 | 54.61 |
| 168 | 47.97 | 55.26 |     |       |       |

---

CK, control; DS, drought stress.
